# Supplementary material
Source: PubMed Central journal article supplement (PMC4398671)
Supplement: 14_146_Zhang.Suppl.pdf [file 14_146_Zhang.Suppl.pdf]

## Supplemental Data

# miR-155 Is Associated with the Leukemogenic Potential of the Class IV Granulocyte Colony Stimulating Factor Receptor in CD34<sup>+</sup> Progenitor Cells

Haijiao Zhang,<sup>1</sup> Lilia Goudeva,<sup>1</sup> Stephan Immenschuh,<sup>1</sup> Axel Schambach,<sup>2,3</sup> Julia Skokowa,<sup>4</sup> Britta Eiz-Vesper,<sup>1</sup> Rainer Blasczyk,<sup>1,3</sup> and Constança Figueiredo<sup>1,3</sup>

Online address: <http://www.molmed.org>

The Feinstein Institute  
for Medical Research 

Empowering Imagination. Pioneering Discovery.®

**Supplemental Table S1.** Primers and probes used for real-time PCR.

| Gene                  | Designation               | Sequence (5'→3')          |
|-----------------------|---------------------------|---------------------------|
| <i>GAPDH</i>          | TaqMan endogenous control | Life Technologies         |
| <i>G-CSFR1</i>        | Forward primer            | GACTGTGTCCTTGGGCCACT      |
|                       | Reverse primer            | TTAAGAGGCAGGCCCAAGAAG     |
|                       | TaqMan probe              | AACCCCAGGAAGCCCTA         |
| <i>G-CSFRIV</i>       | Forward primer            | CAGCCCCAATCCCAGTCT        |
|                       | Reverse primer            | GGAGCATGATCTGGTCCTTAAAGT  |
|                       | TaqMan probe              | TCAGGCTGGGCCTCC           |
| <i>GFI-1</i>          | TaqMan gene expression    | Life Technologies         |
| <i>hsa-miR-155-5p</i> | TaqMan MicroRNA Assay     | UUA AUGCUA AUCGUGAUAGGGGU |
| <i>PU.1</i>           | TaqMan gene expression    | Life Technologies         |
| <i>TP53INP1</i>       | TaqMan gene expression    | Life Technologies         |
| <i>U6 snRNA</i>       | Control miRNA Assay       | Life Technologies         |

DEREGULATION OF MIR-155 LEVELS IN G-CSFRIV<sup>+</sup> HSPCs

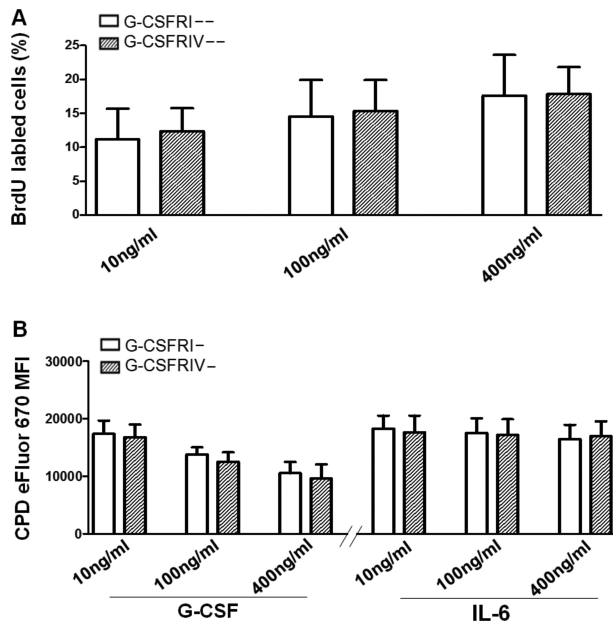

**Supplemental Figure S1.** G-CSFR non-transduced cells demonstrate the same proliferation potential in presence of G-CSF. CD34<sup>+</sup> HSPCs were transduced with a lentiviral vector containing either G-CSFR1 or G-CSFRIV encoding sequences. (A)  $1 \times 10^5$  unsorted cells were stimulated with 10 ng/mL, 100 ng/mL and 400 ng/mL G-CSF for 1 d and incorporated with BrdU for 3 h followed by anti-BrdU antibody staining and FACS analysis. Anti-CD114 was used to distinguish G-CSFR overexpressing and non-expressing cells. Graph displays percentage of BrdU-labeled cells of total G-CSFR1<sup>-/-</sup> and G-CSFRIV<sup>-/-</sup> cells. (B)  $1 \times 10^5$  cells were labeled with (CPD) eFluor 670 and stimulated with indicated concentrations of G-CSF or IL-6 for 3 d followed by FACS analysis. GFP expression was used to distinguish G-CSFR overexpressing and non-transduced cells. Graph displays MFI of CPD eFluor 670 on G-CSFR1<sup>-/-</sup> and G-CSFRIV<sup>-/-</sup> cells. The data shown are mean  $\pm$  SD of 6 independent experiments. Statistically significant differences were calculated using a Student two-tailed *t* test. HSPCs: hematopoietic stem and progenitor cells. G-CSFR1<sup>-/-</sup>: G-CSFR1 non-expressing, G-CSFRIV<sup>-/-</sup>: G-CSFRIV non-expressing. MFI: mean fluorescence intensity. CPD: cell proliferation dye. G-CSFR1<sup>-</sup>: G-CSFR1 non-transduced. G-CSFRIV<sup>-</sup>: G-CSFRIV non-transduced. Statistically significant differences were calculated using a two-tailed Student *t* test.

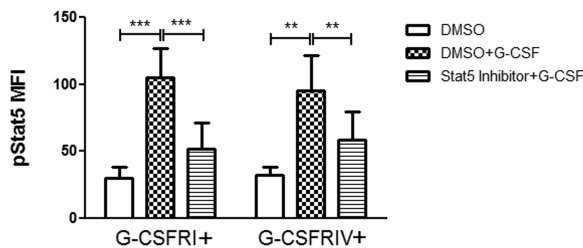

**Supplemental Figure S2.** The Stat5 inhibitor decreases Stat5 phosphorylation. CD34<sup>+</sup> HSPCs were transduced with a lentiviral vector encoding for either G-CSFR1 or G-CSFRIV sequences.  $1 \times 10^5$  serum-starved cells were stimulated with 100 ng/mL G-CSF with DMSO as control or with a Stat5 inhibitor for 20 min and Stat5 phosphorylation was evaluated using BD Phosflow technology. Graph displays MFI of G-CSF induced phosphorylated Stat5 on G-CSFR1<sup>+</sup> and G-CSFRIV<sup>+</sup> HSPCs. The data shown are mean  $\pm$  SD of 5 independent experiments. Statistically significant differences were calculated using a two-tailed Student *t* test and are shown with asterisks (\*\**p* < 0.01 and \*\*\**p* < 0.001). HSPCs: hematopoietic stem and progenitor cells. G-CSFR1<sup>+</sup>: G-CSFR1 overexpressing. G-CSFRIV<sup>+</sup>: G-CSFRIV overexpressing. MFI: mean fluorescence intensity.
